# Supplementary material for: Pan4Draft: A Computational Tool to Improve the Accuracy of Pan-Genomic Analysis Using Draft Genomes
Source: PubMed Central journal article supplement (PMC6018222; doi:10.1038/s41598-018-27800-8), 2018-06-25
Supplement: 41598_2018_27800_MOESM1_ESM.pdf [file 41598_2018_27800_MOESM1_ESM.pdf]

# PAN4DRAFT: A COMPUTATIONAL TOOL TO IMPROVE THE ACCURACY OF PAN-GENOMIC ANALYSIS USING DRAFT GENOMES

Allan Veras<sup>1,+</sup>, Fabricio Araujo<sup>1,+</sup>, Kenny Pinheiro<sup>1</sup>, Luis Guimarães<sup>1</sup>, Vasco Azevedo<sup>2</sup>, Siomar Soares<sup>3</sup>, Artur da Costa da Silva<sup>1</sup>, and Rommel Ramos<sup>1,\*</sup>

<sup>1</sup>Institute of Biological Sciences, Federal University of Pará, Belém, Brazil

<sup>2</sup>Institute of Biological Sciences, Federal University of Minas Gerais, Belo Horizonte, Brazil

<sup>3</sup>Institute of Biological Sciences, Federal University of Triângulo Mineiro, Uberaba, Brazil

\*rommelthiago@gmail.com

+these authors contributed equally to this work

## ABSTRACT

High-throughput sequencing technologies are a milestone in molecular biology for facilitating great advances in genomics by enabling the deposit of large volumes of biological data to public databases. The availability of such data has made possible the comparative genomic analysis through pipelines, using the entire gene repertoire of genomes. However, a large number of unfinished genomes exist in public databases; their number is approximately 16-fold higher than the number of complete genomes, which creates bias during comparative analyses. Therefore, the present work proposes a new tool called Pan4Drafts, an automated pipeline for pan-genomic analysis of draft prokaryotic genomes to maximize the representation and accuracy of the gene repertoire of unfinished genomes by using reads from sequencing data. Pan4Draft allows to perform comparative analyses using different methodologies such as combining complete and draft genomes, using only draft genomes or only complete genomes. Pan4Draft is available at <http://www.computationalbiology.ufpa.br/pan4drafts> and the test dataset is available at <https://sourceforge.net/projects/pan4drafts>.

Table 1. Similarity analysis using the BLAST software considering the genes present in the central genome and accessory.

| ORGANISM                                        | BEFORE PIPELINE |            |                                 | AFTER PIPELINE                                  |            |                                | COMPLETE GENOMES |                     |  |
|-------------------------------------------------|-----------------|------------|---------------------------------|-------------------------------------------------|------------|--------------------------------|------------------|---------------------|--|
|                                                 | Total Products  | Match 100% | Percentage of similarity Before | Total Products                                  | Match 100% | Percentage of similarity After | Total products   | Similarity goal (%) |  |
| SRR2000272                                      | 4664            | 3737       | 80.12                           | 4437                                            | 3655       | 82.38                          | 4920             | 100                 |  |
| SRR2537294                                      | 4356            | 4083       | 93.73                           | 4188                                            | 3952       | 94.36                          | 4396             | 100                 |  |
| SRR2014554                                      | 4339            | 4068       | 93.75                           | 4186                                            | 3948       | 94.31                          | 4369             | 100                 |  |
| SRR1424625                                      | 4461            | 4101       | 91.93                           | 4330                                            | 3964       | 91.55                          | 4501             | 100                 |  |
| ERR007646                                       | 5150            | 4021       | 78.08                           | 4927                                            | 3929       | 79.74                          | 5130             | 100                 |  |
| SRR933487                                       | 8882            | 3907       | 43.99                           | 6684                                            | 3871       | 57.91                          | 5007             | 100                 |  |
| SRR2146161                                      | 5032            | 4103       | 81.54                           | 5032                                            | 4044       | 80.37                          | 5032             | 100                 |  |
| Average                                         |                 |            | 80.45                           | Average                                         |            |                                | 82.95            |                     |  |
| Mean of percentage difference Draft vs Complete |                 |            | 19.55                           | Mean of percentage difference Draft vs Complete |            |                                | 17.05            |                     |  |

Table 1. Similarity analysis using the BLAST software considering the genes present in the central genome.

| ORGANISM                                        | BEFORE PIPELINE |            |                                 | AFTER PIPELINE                                  |            |                                | COMPLETE GENOMES |                     |  |
|-------------------------------------------------|-----------------|------------|---------------------------------|-------------------------------------------------|------------|--------------------------------|------------------|---------------------|--|
|                                                 | Total Products  | Match 100% | Percentage of similarity Before | Total Products                                  | Match 100% | Percentage of similarity After | Total products   | Similarity goal (%) |  |
| SRR2000272                                      | 4664            | 2937       | 62.97                           | 4437                                            | 2895       | 65.25                          | 4920             | 100                 |  |
| SRR2537294                                      | 4356            | 3109       | 71.37                           | 4188                                            | 3041       | 72.61                          | 4396             | 100                 |  |
| SRR2014554                                      | 4339            | 3106       | 71.58                           | 4186                                            | 3052       | 72.91                          | 4369             | 100                 |  |
| SRR1424625                                      | 4461            | 3092       | 69.31                           | 4330                                            | 3017       | 69.68                          | 4501             | 100                 |  |
| ERR007646                                       | 5150            | 3090       | 60.00                           | 4927                                            | 3029       | 61.48                          | 5130             | 100                 |  |
| SRR933487                                       | 8882            | 3036       | 34.18                           | 6684                                            | 3010       | 45.03                          | 5007             | 100                 |  |
| SRR2146161                                      | 5032            | 3138       | 62.36                           | 5032                                            | 3082       | 61.25                          | 5032             | 100                 |  |
| Average                                         |                 |            | 61.68                           | Average                                         |            |                                | 64.03            |                     |  |
| Mean of percentage difference Draft vs Complete |                 |            | 38.32                           | Mean of percentage difference Draft vs Complete |            |                                | 35.97            |                     |  |

Table 1. Similarity analysis using the BLAST software considering the genes present in the accessory genome.

| ORGANISM                                        | BEFORE PIPELINE |            |                                 | AFTER PIPELINE                                  |            |                                | COMPLETE GENOMES |                     |  |
|-------------------------------------------------|-----------------|------------|---------------------------------|-------------------------------------------------|------------|--------------------------------|------------------|---------------------|--|
|                                                 | Total Products  | Match 100% | Percentage of similarity Before | Total Products                                  | Match 100% | Percentage of similarity After | Total products   | Similarity goal (%) |  |
| SRR2000272                                      | 4664            | 800        | 17.15                           | 4437                                            | 760        | 17.13                          | 4920             | 100                 |  |
| SRR2537294                                      | 4356            | 974        | 22.36                           | 4188                                            | 911        | 21.75                          | 4396             | 100                 |  |
| SRR2014554                                      | 4339            | 962        | 22.17                           | 4186                                            | 896        | 21.40                          | 4369             | 100                 |  |
| SRR1424625                                      | 4461            | 1009       | 22.62                           | 4330                                            | 947        | 21.87                          | 4501             | 100                 |  |
| ERR007646                                       | 5150            | 931        | 18.08                           | 4927                                            | 900        | 18.27                          | 5130             | 100                 |  |
| SRR933487                                       | 8882            | 871        | 9.81                            | 6684                                            | 861        | 12.88                          | 5007             | 100                 |  |
| SRR2146161                                      | 5032            | 965        | 19.18                           | 5032                                            | 962        | 19.12                          | 5032             | 100                 |  |
| Average                                         |                 |            | 18.77                           | Average                                         |            |                                | 18.92            |                     |  |
| Mean of percentage difference Draft vs Complete |                 |            | 81.23                           | Mean of percentage difference Draft vs Complete |            |                                | 81.08            |                     |  |

Table 2. Analysis of amount frameshifts

| ORGANISM   | BEFORE PIPELINE | AFTER PIPELINE | COMPLETE GENOMES |
|------------|-----------------|----------------|------------------|
| SRR2000272 | 349             | 227            | 460              |
| SRR2537294 | 279             | 194            | 285              |
| SRR2014554 | 273             | 174            | 273              |
| SRR1424625 | 287             | 177            | 289              |
| ERR007646  | 374             | 274            | 385              |
| SRR933487  | 998             | 855            | 424              |
| SRR2146161 | 367             | 367            | 367              |

Figure 1. Analysis of similarity between: (A) genes present in the core genomes; (B) genes present in the core and accessory genomes; (B) genes present in accessory genomes.

(A)

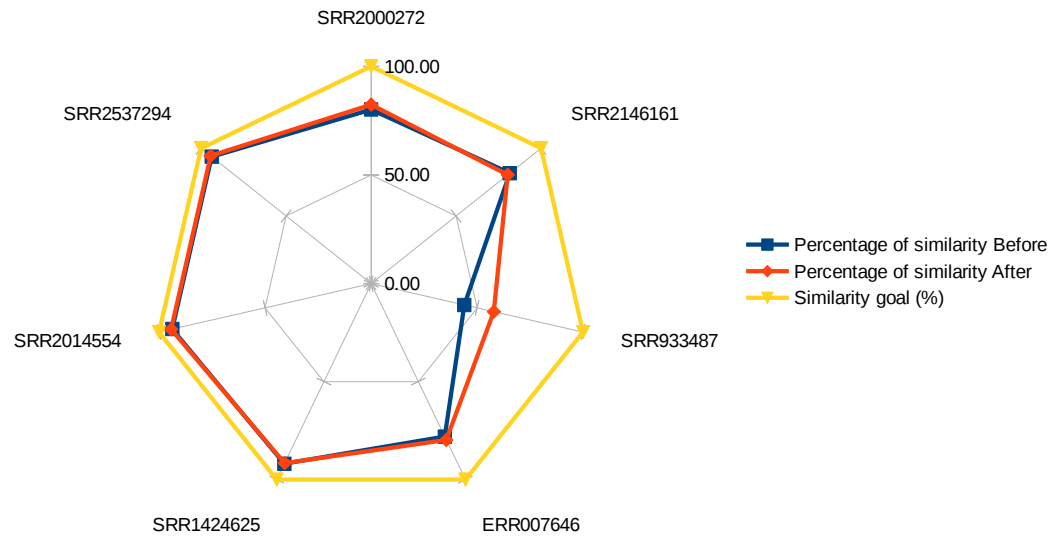

(B)

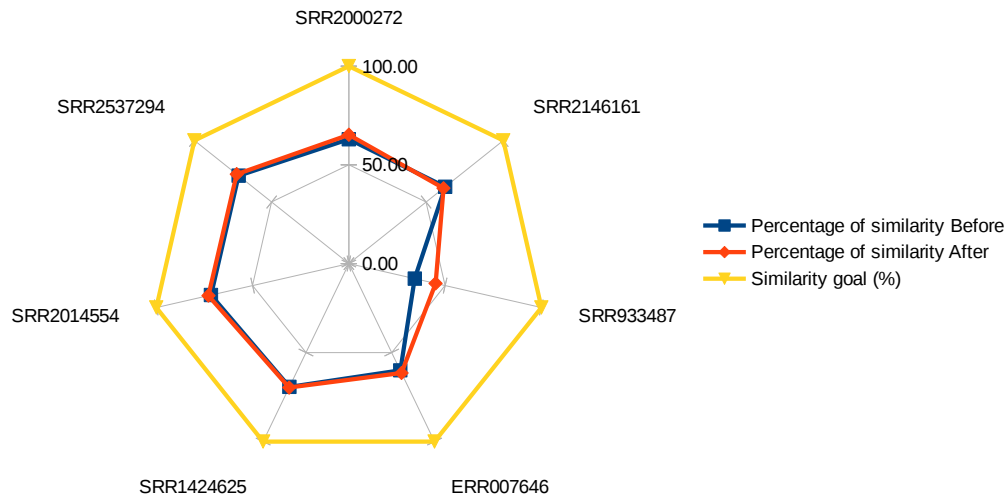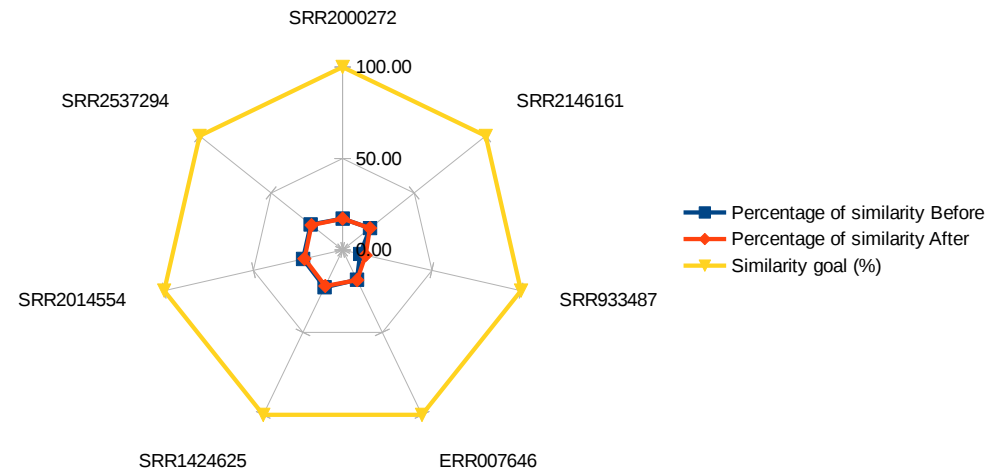

Figure 2. The result uniques for each strain for complete genome analysis.

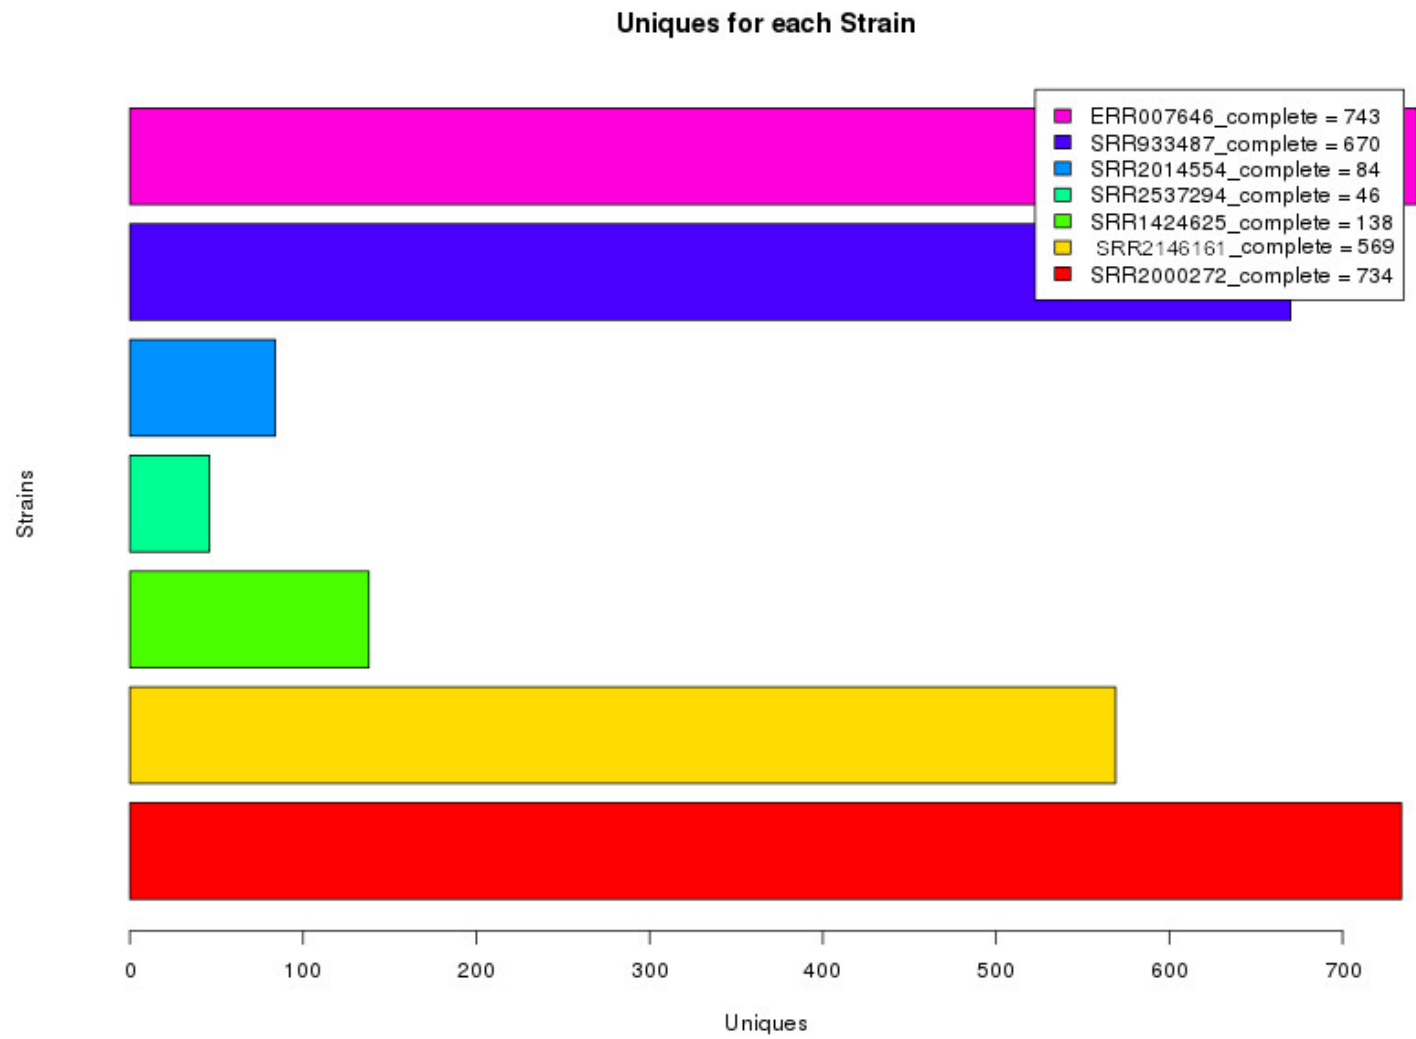

Figure 3. The result uniques for each strain for before pipeline.

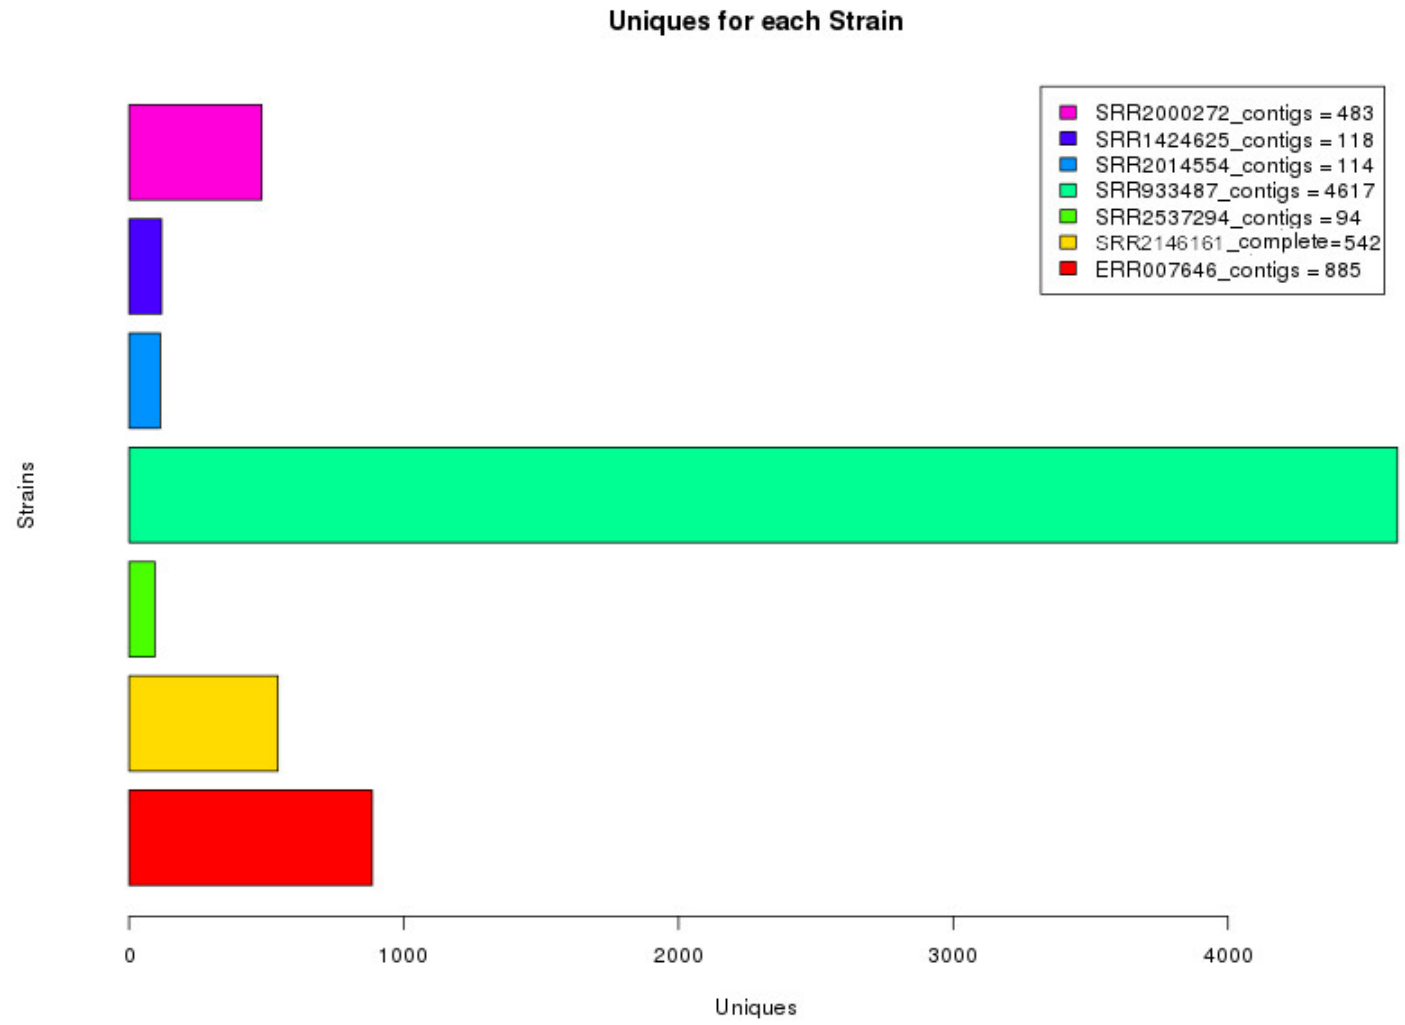

Figure 4. The result uniques for each strain for after pipeline.

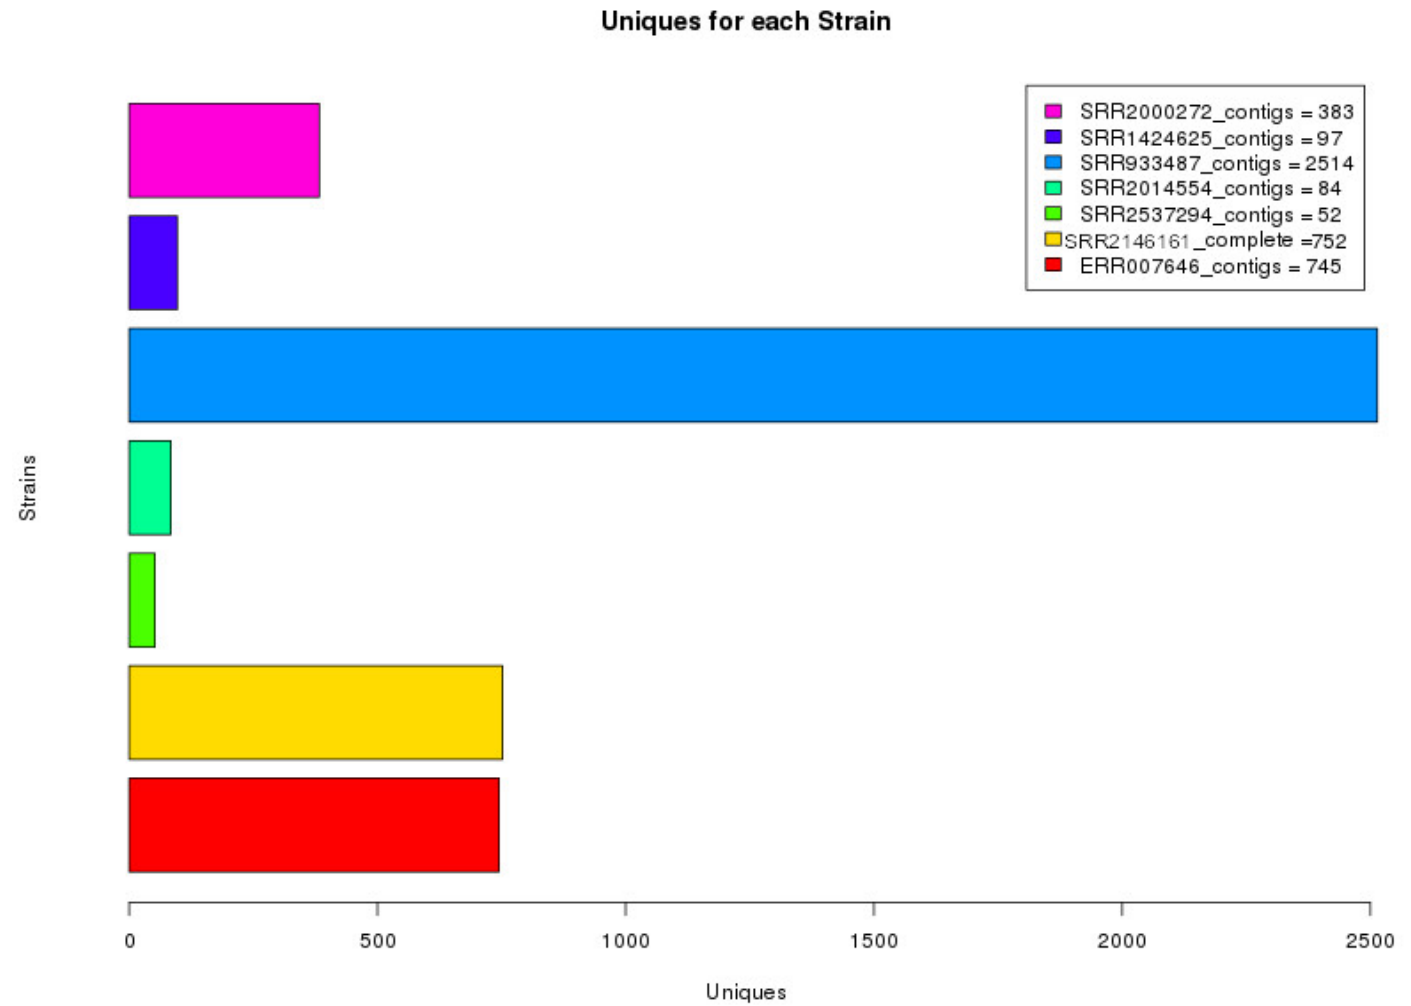

Figure 5. The result panggenome analysis complete genomes.

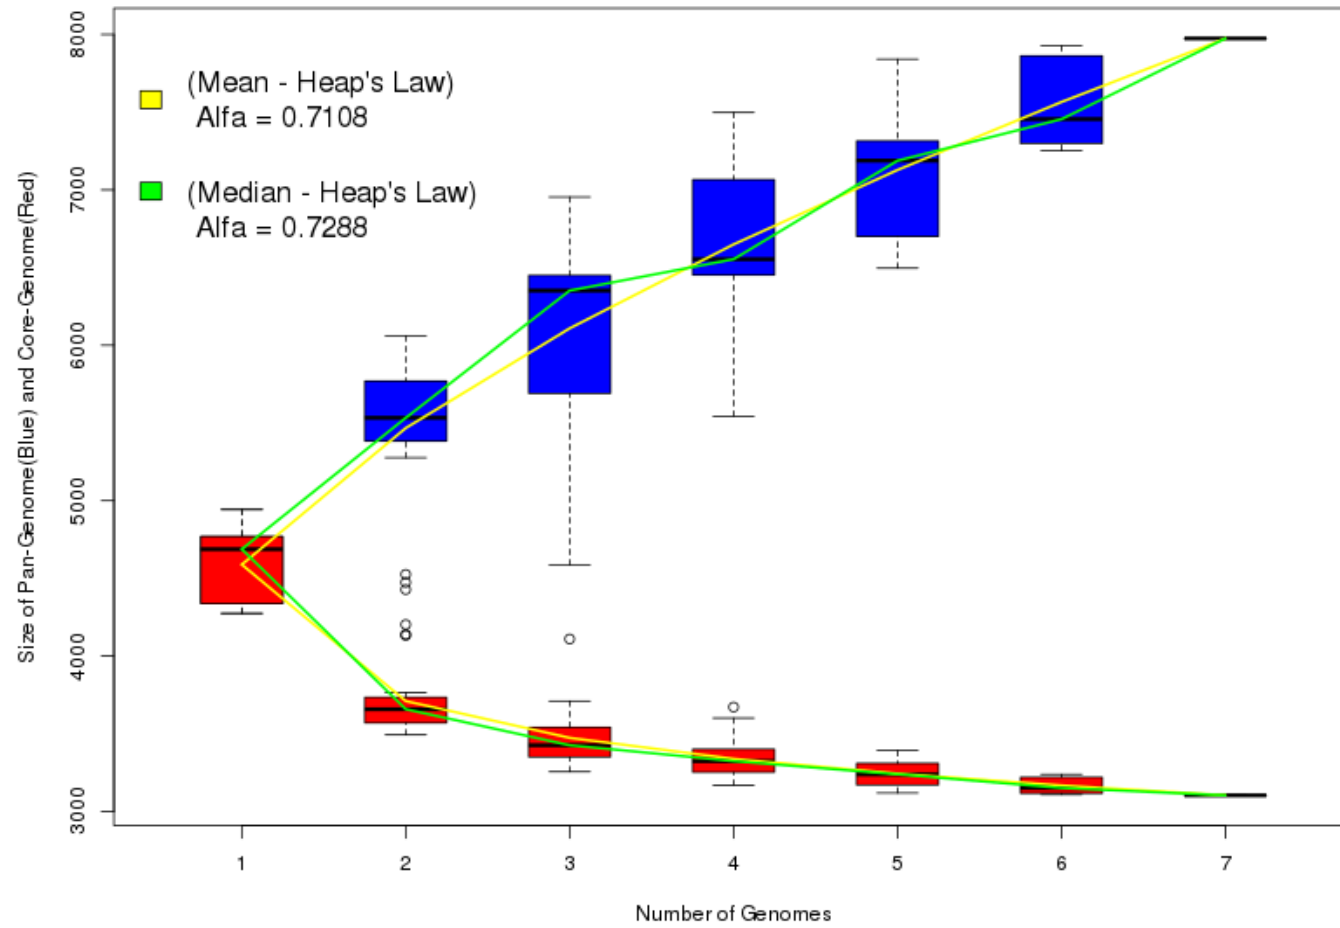

Figure 6. The result panggenome analysis before pipeline.

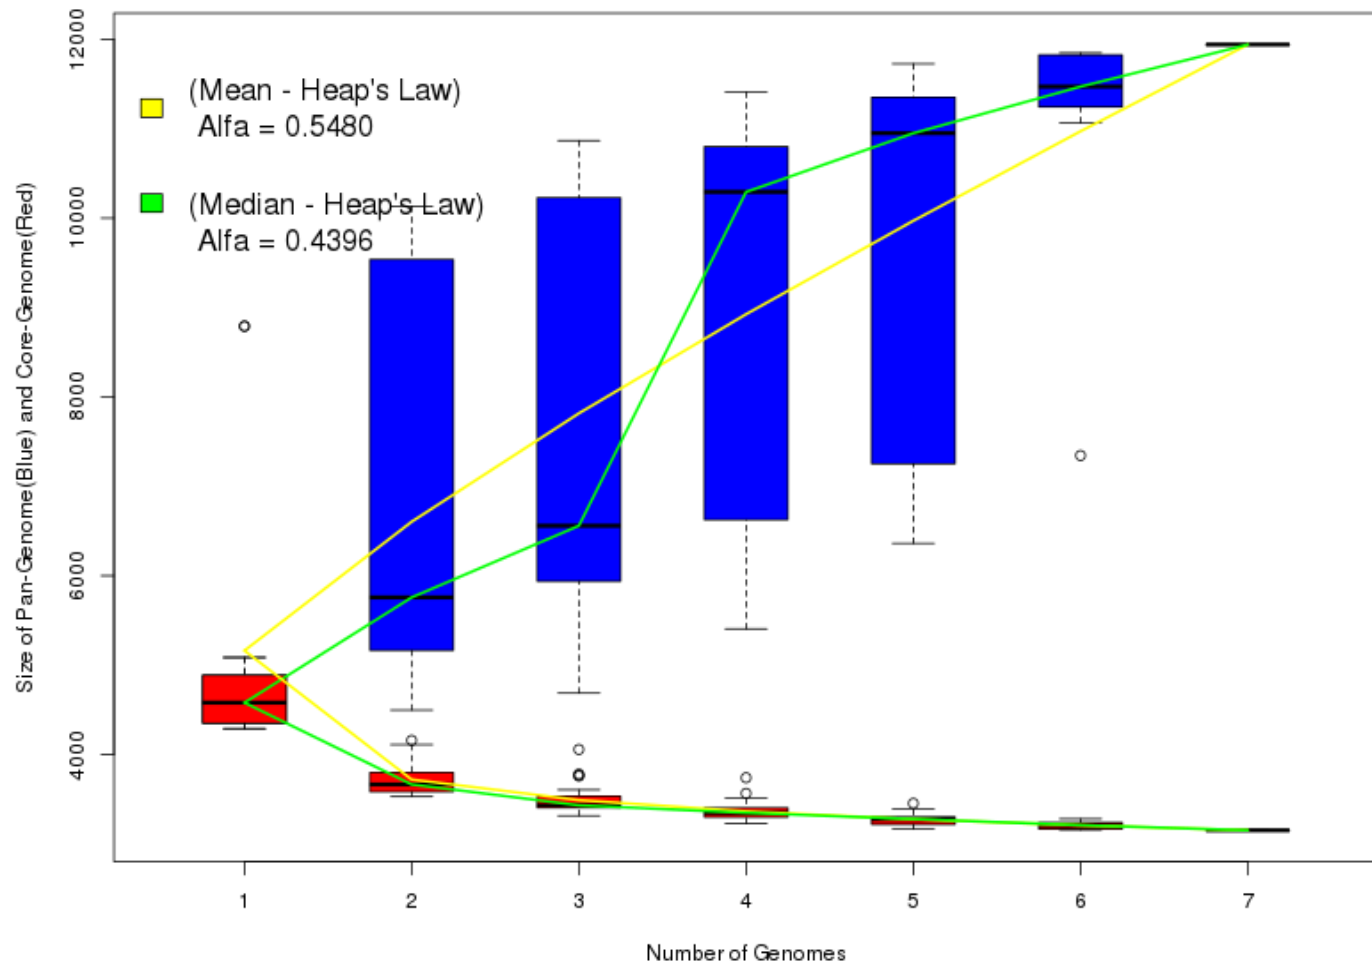



Figure 7. The result pangenome analysis after pipeline.

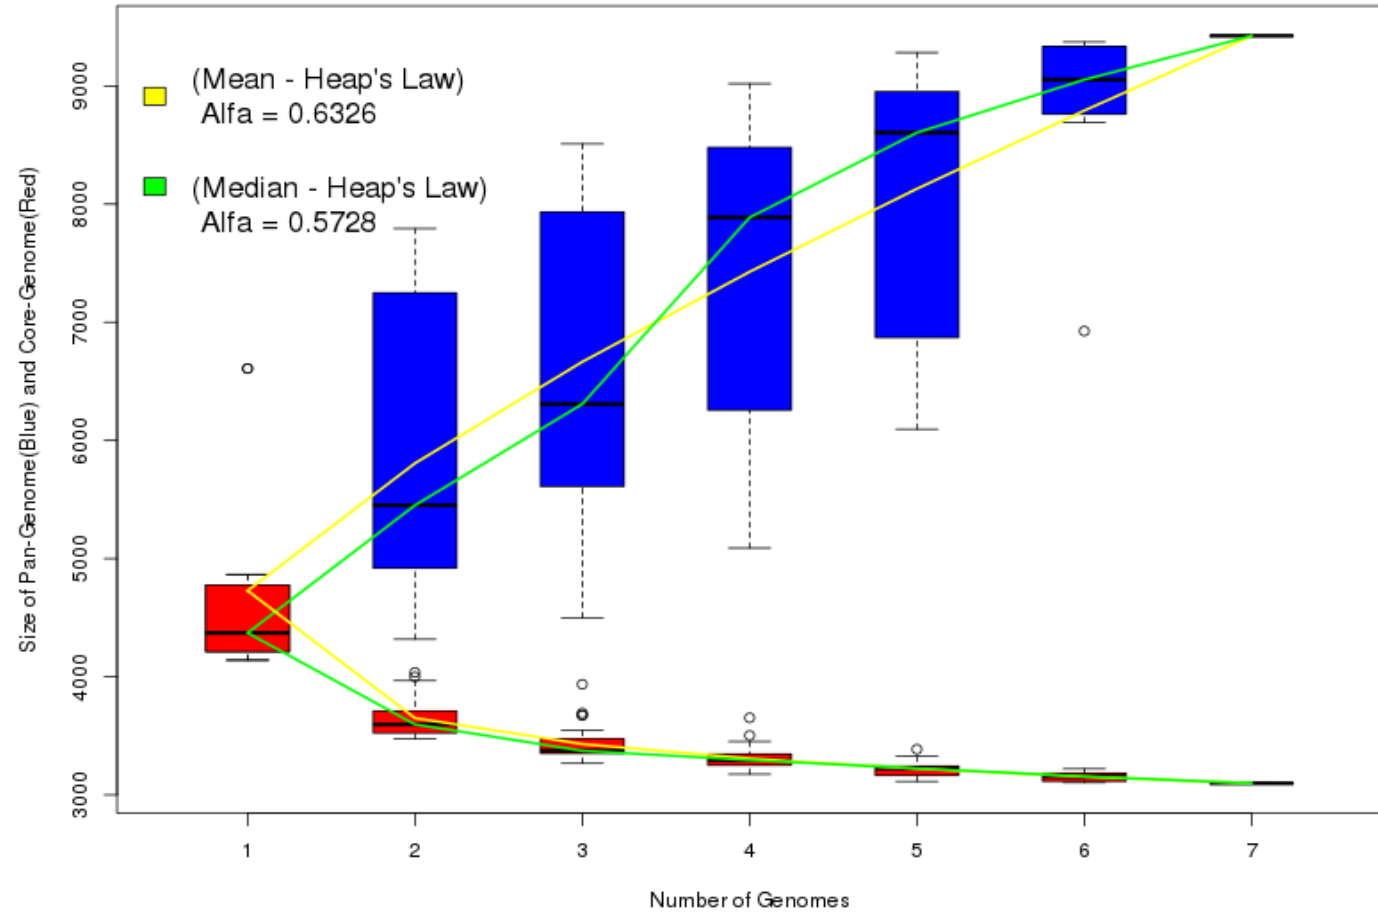

Figure 8. Phylogenetic tree based on the UPGMA algorithm, constructed based on the gene distance matrix for clusters of major genes.

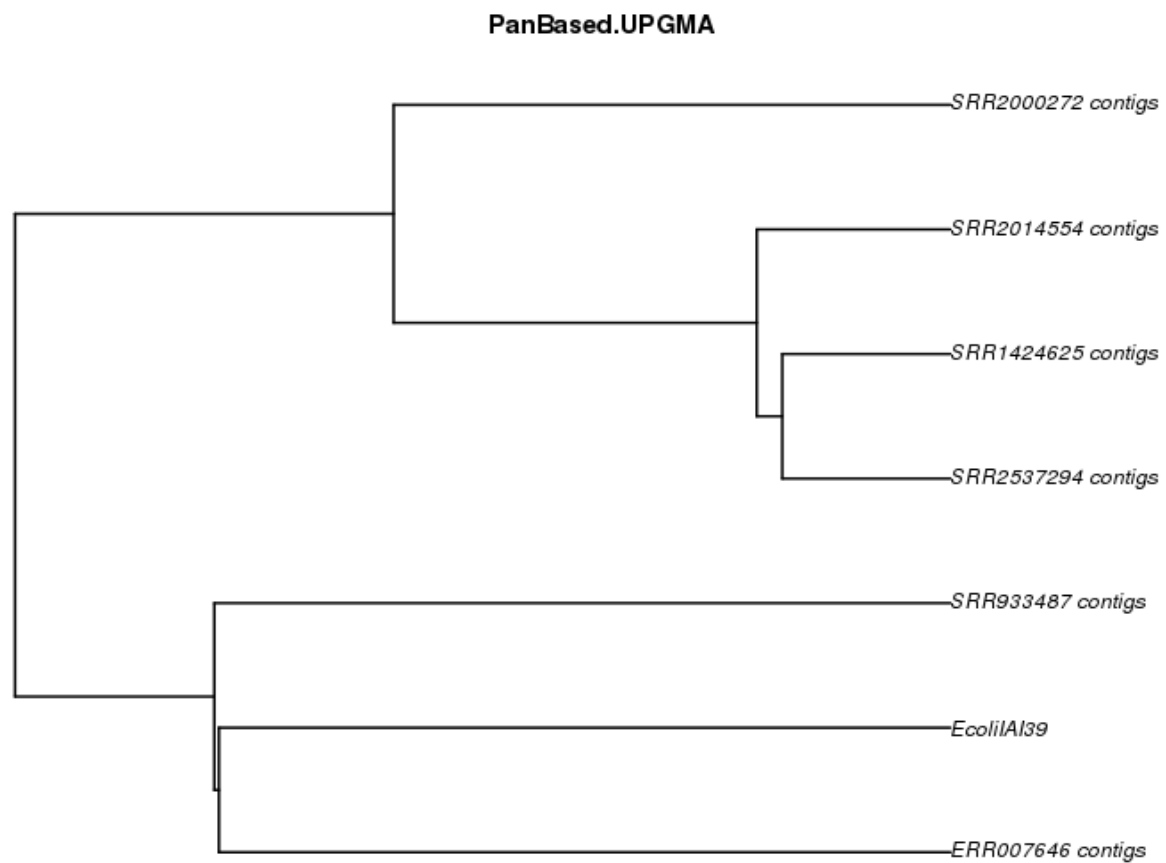

Figure 9. Phylogenetic tree based on the UPGMA algorithm, based on the indel variations in the nucleus-gene clusters

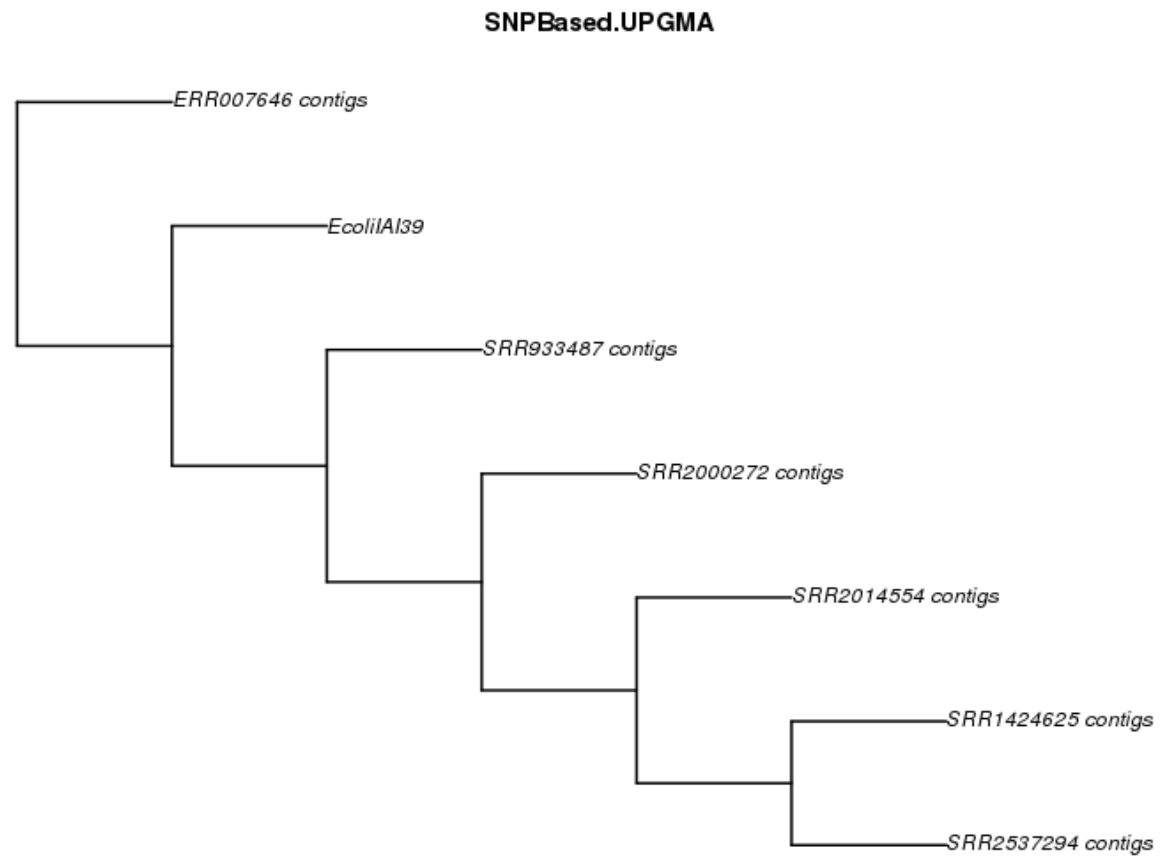

Figure 10. Phylogenetic tree based on the ML algorithm

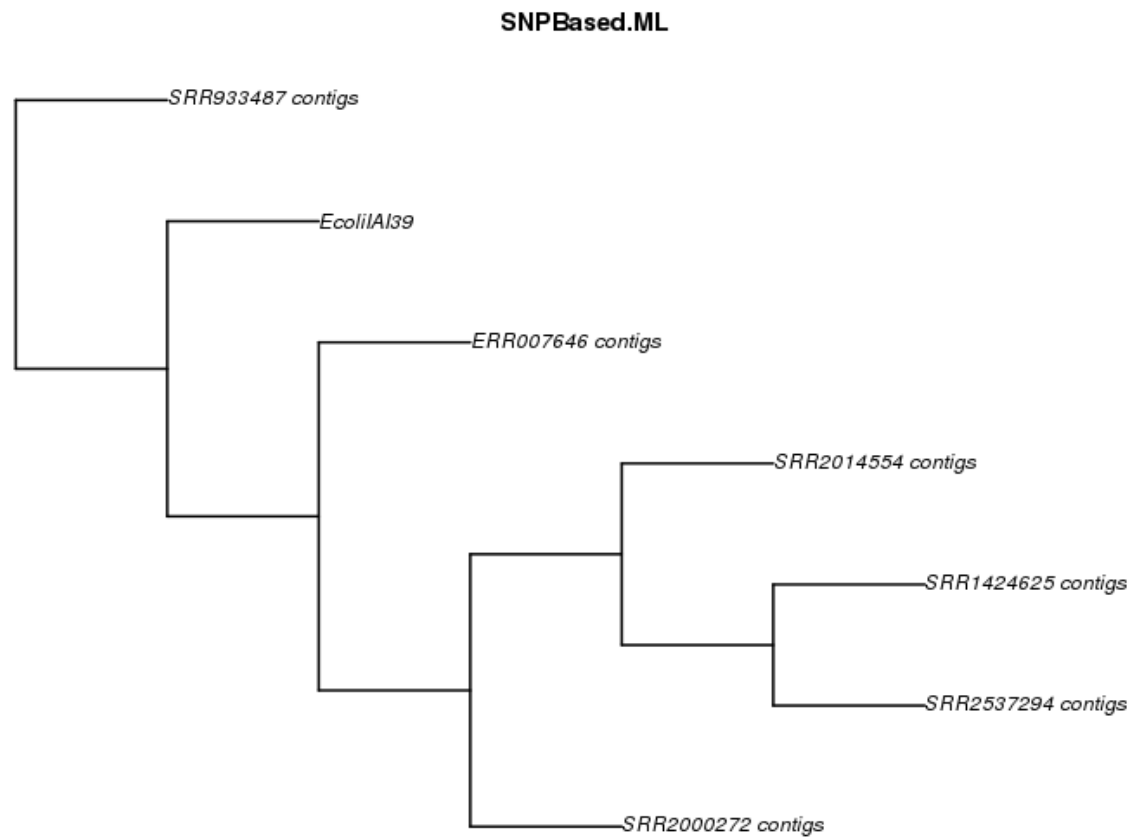

Figure 11. The results analysis with Gegenees Software.

| Organism               | 1   | 2   | 3   | 4   | 5   | 6   | 7   |
|------------------------|-----|-----|-----|-----|-----|-----|-----|
| 1: ERR007646_complete  | 100 | 73  | 74  | 73  | 76  | 74  | 74  |
| 2: SRR1424625_complete | 81  | 100 | 90  | 96  | 79  | 98  | 78  |
| 3: SRR2000272_complete | 79  | 87  | 100 | 86  | 77  | 87  | 76  |
| 4: SRR2014554_complete | 84  | 99  | 92  | 100 | 82  | 99  | 80  |
| 5: SRR2146161_complete | 79  | 74  | 75  | 74  | 100 | 74  | 78  |
| 6: SRR2537294_complete | 83  | 100 | 92  | 98  | 81  | 100 | 79  |
| 7: SRR933487_complete  | 76  | 72  | 72  | 71  | 76  | 72  | 100 |
